# Supplementary material
Source: PubMed Central journal article supplement (PMC9112137)
Supplement: jamapediatr-e221301-s001.pdf [file jamapediatr-e221301-s001.pdf]

## Supplemental Online Content

Balamuth F, Scott HF, Weiss SL, et al; Pediatric Emergency Care Applied Research Network (PECARN) PED Screen and PECARN Registry Study Groups. Validation of the pediatric Sequential Organ Failure Assessment Score and evaluation of Sepsis-3 definitions in the pediatric emergency department. *JAMA Pediatr*. Published on May 16, 2022. doi:10.1001/jamapediatrics.2022.1301

**eTable 1.** List of laboratory testing used to define suspected infection

**eTable 2.** Adapted definitions of pSOFA elements based on emergency department data

**eTable 3.** Contributions to pSOFA points by element

**eTable 4.** Presence of each pSOFA element in survivors and non survivors

**eTable 5.** Area under the curve analysis for each pSOFA cutpoint truncated at 13

**eTable 6.** Test characteristics of pSOFA  $\geq 2$  as predictor of in-hospital mortality for all ED patients when ED deaths are included

**eTable 7.** Sensitivity analysis where septic shock is defined as suspected infection + pSOFA  $\geq 2$  + vasoactive medication, removing the requirement for lactate testing

**eTable 8.** Distribution of CCC in study population. Visits may have more than one CCC

**eTable 9.** a. Timing of death in suspected infection cohort, b. test characteristics of pSOFA  $\geq 2$  as predictor of in-hospital mortality among patients with suspected infection

This supplemental material has been provided by the authors to give readers additional information about their work.

eTable 1: List of laboratory tests included in definition of suspected infection

| <b>LabTestName</b>                                                  | <b>MBTESTNAME</b>                                   |
|---------------------------------------------------------------------|-----------------------------------------------------|
| ACID FAST CULTURE ID AND SENSITIVITIES                              | ACID FAST CULTURE ID AND SENSITIVITIES              |
| ADENOVIRUS 40/41 ANTIGEN                                            | ADENOVIRUS - QUALITATIVE PCR                        |
| ADENOVIRUS ANTIBODY                                                 | ADENOVIRUS - QUANTITATIVE PCR                       |
| ADENOVIRUS CULTURE                                                  | ADENOVIRUS 40/41, STOOL                             |
| ADENOVIRUS DNA PCR                                                  | ADENOVIRUS ANTIBODIES, SERUM (SB)                   |
| ADENOVIRUS PCR                                                      | ADENOVIRUS ANTIBODY                                 |
| ADENOVIRUS PCR QUANTITATIVE                                         | ADENOVIRUS BLOOD BY PCR, QUAL                       |
| ADENOVIRUS QUANTITATIVE PCR                                         | ADENOVIRUS CSF BY PCR, QUAL                         |
| ADENOVIRUS QUANTITATIVE PCR BLOOD                                   | ADENOVIRUS CULTURE                                  |
| ADENOVIRUS QUANTITATIVE PCR CSF                                     | ADENOVIRUS NAAT NON BLOOD                           |
| ADENOVIRUS QUANTITATIVE PCR STOOL                                   | ADENOVIRUS PCR QUAL                                 |
| ADENOVIRUS QUANTITATIVE PCR URINE                                   | ADENOVIRUS PCR QUAL - STOOL ONLY                    |
| ADENOVIRUS, QUALITATIVE BY PCR (OTHER THAN BLOOD)                   | ADENOVIRUS PCR QUANT FOR SOURCES OTHER THAN BLOOD   |
| ADENOVIRUS, QUALITATIVE, BY PCR (BLOOD) WITH REFLEX TO QUANTITATIVE | ADENOVIRUS PCR QUANTITATIVE                         |
| ADENOVIRUS, QUANTITATIVE, RT-PCR, BLOOD, REFLEX                     | ADENOVIRUS QUALITATIVE PCR                          |
| AEROBIC BLOOD CULTURE                                               | ADENOVIRUS QUANTITATIVE PCR                         |
| AFB CULTURE AND SMEAR, ID AND SENSITIVITY                           | ADENOVIRUS QUANTITATIVE PCR BLOOD                   |
| ANAEROBIC BLOOD CULTURE                                             | ADENOVIRUS QUANTITATIVE PCR CSF                     |
| ANAEROBIC CULTURE & GRAM SMEAR                                      | ADENOVIRUS QUANTITATIVE PCR STOOL                   |
| ANTI STREP O TITER                                                  | ADENOVIRUS QUANTITATIVE PCR URINE                   |
| ANTI-STREPTOLYSIN O (ASO)                                           | ADENOVIRUS, MOLECULAR DETECTION, TISSUE, BODY FLUID |
| ANTI-STREPTOLYSIN O TITER                                           | AEROBIC BACTERIAL CULTURE                           |
| ARBOVIRUS AB IGG IGM, CSF                                           | AEROBIC BLOOD CULTURE                               |
| ARBOVIRUS ANTIBODIES IGG, IGM                                       | AEROBIC BROTH CULTURE                               |
| ARBOVIRUS ANTIBODIES IGG, IGM CSF                                   | AEROBIC CULTURE AND GRAM STAIN                      |
| ARBOVIRUS ANTIBODY PANEL (SERUM)                                    | AFB BLOOD CULTURE, ID AND SENSITIVITY               |
| ASTROVIRUS PCR                                                      | AFB CULT, BLOOD/BONE MARROW                         |
| B PERTUSSIS/B PARAPERTUSSIS PCR                                     | AFB CULT, RESPIRATORY                               |
| BARTONELLA DNA PCR                                                  | AFB CULT, SUPERFICIAL                               |
| BARTONELLA PCR, B                                                   | AFB CULT, TISSUE-CLEAR FLUID                        |

|                                                   |                                           |
|---------------------------------------------------|-------------------------------------------|
| BBK MD SEROLOGY CONSULT                           | AFB CULTURE                               |
| BK VIRUS DNA PCR                                  | AFB CULTURE AND SMEAR, ID AND SENSITIVITY |
| BK VIRUS PCR, URINE                               | ANAEROBIC BLOOD BACTERIAL                 |
| BK VIRUS QUANT PCR PLASMA                         | ANAEROBIC BLOOD BACTERIAL GRP             |
| BK VIRUS QUANT PCR URINE                          | ANAEROBIC BLOOD CULTURE                   |
| BK VIRUS QUANTITATIVE DNA PCR                     | ANAEROBIC BROTH CULTURE                   |
| BK VIRUS QUANTITATIVE RT PCR PLASMA               | ANAEROBIC BROTH WKUP                      |
| BK VIRUS QUANTITATIVE RT PCR URINE                | ANAEROBIC CULTURE                         |
| BMT STOOL CULTURE SCREEN                          | ANAEROBIC CULTURE & GRAM SMEAR            |
| BORDETELLA PERTUSSIS CULTURE                      | ANAEROBIC WORKUP                          |
| BORDETELLA PERTUSSIS PCR                          | ANTI-STREPTOLYSIN O                       |
| BORRELIA SPECIES BY PCR                           | ARBOVIRUS IGG ANTIBODY PANEL              |
| BORRELIA SPECIES PCR                              | ARBOVIRUS IGM ANTIBODY PANEL              |
| C. DIFFICILE TOXIN PCR                            | ASP-FLUID WORKUP                          |
| C. TRACHOMATIS & N. GONORRHOEAE QUAL PCR          | ASPIRATE BROTH PCR PANEL                  |
| C. TRACHOMATIS AND N. GONORRHEA PCR,THR OR RECTAL | ASPIRATE BROTH WORKUP                     |
| C. TRACHOMATIS AND N. GONORRHOEAE PCR             | ASPIRATION CULTURE WORKUP                 |
| C. TRACHOMATIS & N. GONORRHOEAE QUAL PCR          | ATYPICAL PNEUMONIA PANEL PCR              |
| CF RESPIRATORY CULTURE                            | B PERTUSSIS/B PARAPERTUSSIS PCR           |
| CF RESPIRATORY CULTURE & GRAM SMEAR               | B PERTUSSIS/PARAPERTUSSIS NAAT            |
| CHLAMYDIA CULTURE                                 | B. PARAPERTUSSIS PCR                      |
| CHLAMYDIA PNEUMONIAE PCR                          | B. PERTUSSIS/B. PARAPERTUSSIS PCR         |
| CHLAMYDIA TRACHOMATIS CULTURE                     | BACTERIAL CULTURE                         |
| CHLAMYDIA TRACHOMATIS PCR                         | BACTERIAL STOOL CX                        |
| CHLAMYDIA TRACHOMATIS QUALITATIVE PCR             | BAL WORKUP                                |
| CMV BY PCR, STL, UR, RESP                         | BARTONELLA DNA PCR                        |
| CMV DNA QUALITATIVE PCR                           | BARTONELLA PCR, B                         |
| CMV DNA QUANTITATIVE PCR                          | BARTONELLA SPECIES BY PCR                 |
| CMV DNA QUANTITATIVE PCR (NON BLOOD)              | BK VIRUS - QUALITATIVE PCR                |
| CMV IGG SEROLOGY                                  | BK VIRUS - QUANTITATIVE PCR               |
| CMV QUANT PCR CSF                                 | BK VIRUS PCR QUANT                        |
| CMV QUANT PCR URINE                               | BK VIRUS PCR, BLOOD                       |
| CMV QUANTITATIVE DNA PCR                          | BK VIRUS PCR, QUANT, U                    |
| CMV SEROLOGY (EIA)                                | BK VIRUS QUANT PCR PLASMA                 |

|                                                   |                                           |
|---------------------------------------------------|-------------------------------------------|
| CMV SEROLOGY (EIA)-COMBO                          | BK VIRUS QUANT PCR URINE                  |
| CMV SEROLOGY IGG                                  | BK VIRUS QUANTITATIVE PCR                 |
| CORONAVIRUS 229E PCR                              | BK VIRUS QUANTITATIVE RT PCR PLASMA       |
| CORONAVIRUS HKU1 PCR                              | BK VIRUS QUANTITATIVE RT PCR URINE        |
| CORONAVIRUS NL 63 PCR                             | BLOOD BACTERIAL CULTURE                   |
| CORONAVIRUS OC43 PCR                              | BLOOD BACTERIAL CULTURE-SECOND            |
| CORONAVIRUS PCR PANEL                             | BLOOD BACTERIAL GROUP                     |
| CSF CULTURE AND GRAM SMEAR                        | BLOOD BACTERIAL GROUP-SECOND              |
| CULTURE, LEGIONELLA                               | BLOOD CULTURE                             |
| CYTOMEGALOVIRUS AB IGM , S                        | BLOOD CULTURE ID BY FILM ARRAY            |
| CYTOMEGALOVIRUS ANTIBODY IGG                      | BLOOD CULTURE IDENTIFICATION PANEL (BCID) |
| CYTOMEGALOVIRUS ANTIBODY IGM                      | BLOOD PARASITE                            |
| CYTOMEGALOVIRUS ANTIBODY, IGM                     | BLOOD PARASITE EXAM                       |
| CYTOMEGALOVIRUS IGG                               | BLOOD/BONE MARROW CULTURE                 |
| CYTOMEGALOVIRUS IGG ANTIBODY                      | BMT STOOL CULTURE SCREEN                  |
| CYTOMEGALOVIRUS IGM ANTIBODY                      | BMT STOOL SURVEILLANCE CULTURE            |
| CYTOMEGALOVIRUS PCR                               | BODY FLUID CULTURE                        |
| CYTOMEGALOVIRUS QUAL PCR                          | BODY FLUID CULTURE AND GRAM STAIN         |
| CYTOMEGALOVIRUS QUANT PCR, STOOL                  | BODY FLUID IN BC MEDIA                    |
| CYTOMEGALOVIRUS QUANTITATIVE PCR BLOOD            | BORDETELLA PERTUSSIS CULTURE              |
| DONOR, EPSTEIN-BARR VIRUS (EBV) ANTIBODIES, SERUM | BORDETELLA PERTUSSIS DNA (PCR)            |
| EB VIRUS IGG                                      | BORDETELLA PERTUSSIS PCR                  |
| EB VIRUS IGM                                      | BORDETELLA PERTUSSIS/PARAPERTUSSIS PCR    |
| EB VIRUS NUCLEAR ANTIGEN, EBNA                    | BORRELIA SPECIES BY PCR (LYME DISEASE)    |
| EBV IGG SEROLOGY PANEL                            | BORRELIA SPECIES PCR                      |
| EBV PCR QUANTITATIVE CSF                          | BROTH WKUP                                |
| EBV QUALITATIVE DNA PCR                           | BRUCELLA PCR QUAL                         |
| EBV QUANTITATIVE PCR                              | BURN CULTURE                              |
| EBV VIRAL CAPSID ANTIBODY IGG                     | C. DIFFICILE PCR (ILLUMIGENE)             |
| EBV VIRAL CAPSID ANTIBODY IGM                     | C. DIFFICILE TOXIN B PCR                  |
| EBV VIRAL CAPSID ANTIBODY IGM CSF                 | C. DIFFICILE TOXIN PCR                    |
| ECHOVIRUS ANTIBODY PANEL, S                       | C. PNEUMONIAE PCR                         |
| ECHOVIRUS ANTIBODY, CSF                           | C. TRACHOMATIS & N. GONORRHOEAE QUAL PCR  |
| ECHOVIRUS ANTIBODY, SERUM                         | C. TRACHOMATIS AND N. GONORRHOEAE PCR     |

|                                               |                                                   |
|-----------------------------------------------|---------------------------------------------------|
| ENTEROVIRUS ANTIBODY PANEL                    | C.DIFFICILE PCR                                   |
| ENTEROVIRUS ANTIBODY PANEL, CSF               | C.TRACHOMATIS & N. GONORRHOEAE QUAL PCR           |
| ENTEROVIRUS CULTURE                           | CATHETER TIP CULTURE                              |
| ENTEROVIRUS PCR                               | CENTRAL LINE CATHETER TIP CULTURE                 |
| ENTEROVIRUS QUALITATIVE PCR                   | CF PATHOGEN CULT FOR SPUTUM                       |
| ENTEROVIRUS RNA PCR                           | CF PATHOGEN CULTURE FOR SPUTUM/BAL                |
| EPSTEIN-BARR VIRUS PCR QUALITATIVE            | CF PATHOGEN CULTURE THROAT                        |
| EPSTEIN-BARR VIRUS PCR QUANTITATIVE           | CF RESPIRATORY CULTURE                            |
| EPSTEIN-BARR VIRUS QUANT                      | CF RESPIRATORY CULTURE & GRAM SMEAR               |
| EPSTEIN-BARR VIRUS SEROLOGY                   | CF RESPIRATORY CULTURE AND GRAM STAIN             |
| EPSTEIN-BARR VIRUS-QUALITATIVE                | CHLAMYDIA CULTURE                                 |
| FUNGAL BLOOD CULTURE                          | CHLAMYDIA PNEUMONIAE CULTURE                      |
| FUNGAL CULTURE                                | CHLAMYDIA PNEUMONIAE PCR                          |
| FUNGAL CULTURE (NOT BLOOD)                    | CHLAMYDIA TRACHOMATIS AND NEISSERIA GONORRHEA PCR |
| GI ADENOVIRUS DNA PCR                         | CHLAMYDIA TRACHOMATIS CULTURE                     |
| GI VIRUS PCR PANEL                            | CHLAMYDIA TRACHOMATIS ISOLATION PANEL             |
| GOLDBERG CLINIC RAPID GRP A STREP ASSAY       | CHLAMYDIA TRACHOMATIS PCR                         |
| GROUP A STREPTOCOCCUS ANTIBODY PANEL          | CHLAMYDIA TRACHOMATIS QUALITATIVE PCR             |
| GROUP A STREPTOCOCCUS ANTIGEN DETECTION       | CLOSTRIDIUM DIFFICILE TOXIN BY PCR, STOOL         |
| GROUP A STREPTOCOCCUS MOLECULAR ASSAY         | CMV - QUALITATIVE PCR                             |
| HANTAVIRUS ANTIBODY                           | CMV - QUANTITATIVE PCR                            |
| HCV GENOTYPING PCR & SEQUENCE                 | CMV (CYTOMEGALOVIRUS), QUANTITATIVE PCR, BLOOD    |
| HEPATITIS B QUALITATIVE PCR                   | CMV ANTIBODY, IGM & IGG, SERUM                    |
| HEPATITIS B QUANTITATIVE PCR                  | CMV BLOOD BY PCR QUALITATIVE                      |
| HEPATITIS B VIRAL DNA LOAD                    | CMV BY PCR, QUALITATIVE                           |
| HEPATITIS B VIRAL DNA, QN, S                  | CMV BY PCR, QUANTITATIVE                          |
| HEPATITIS B VIRAL DNA, QUANT                  | CMV Culture                                       |
| HEPATITIS B VIRAL DNA,QUANT                   | CMV CULTURE GROUP                                 |
| HEPATITIS C PCR QUANT                         | CMV DNA QUANTITATIVE PCR                          |
| HEPATITIS C RNA PCR                           | CMV DNA QUANTITATIVE PCR (NON BLOOD)              |
| HEPATITIS C VIRAL RNA GENOTYPE                | CMV PCR QUANT                                     |
| HEPATITIS C VIRAL RNA, QUANTITATIVE, (RT-PCR) | CMV PCR QUANTITATIVE                              |
| HEPATITIS C VIRUS ANTIBODY                    | CMV QUANT PCR CSF                                 |
| HEPATITIS C VIRUS RNA QUALITATIVE PCR         | CMV QUANT PCR URINE                               |

|                                                        |                                             |
|--------------------------------------------------------|---------------------------------------------|
| HEPATITIS C, RNA QUANTITATIVE PCR                      | CMV, MOLECULAR DETECTION, TISSUE/BODY FLUID |
| HEPATITIS DELTA VIRUS ANTIBODY                         | COLORADO TICK FEVER PCR QUAL                |
| HERPES SEROLOGY (IGG)                                  | CORONAVIRUS NAAT                            |
| HERPES SIMPLEX VIRUS (HSV), MOLECULAR DETECTION, BLOOD | CORONAVIRUS PCR                             |
| HERPES SIMPLEX VIRUS AB IGM, S                         | CSF BACTERIAL CULTURE GROUP                 |
| HERPES SIMPLEX VIRUS ANTIBODIES, IGM, SERUM            | CSF BROTH WORKUP                            |
| HERPES SIMPLEX VIRUS CULTURE                           | CSF CULTURE (BACTERIAL)                     |
| HERPES SIMPLEX VIRUS PCR                               | CSF CULTURE AND GRAM SMEAR                  |
| HERPES SIMPLEX VIRUS PCR QUAL                          | CSF CULTURE AND GRAM STAIN                  |
| HERPES SIMPLEX VIRUS PCR QUAL-COMBO                    | CULTURE - ANAEROBIC                         |
| HERPES SIMPLEX VIRUS TYPES 1 AND 2 AB, IGG, S          | CULTURE - ANAEROBIC-COMBO                   |
| HERPES VIRUS 6 AB (IGG, IGM)                           | CULTURE - BLOOD                             |
| HERPESVIRUS 7 (HHV-7) DNA, QUANTITATIVE, BLOOD         | CULTURE - BLOOD-COMBO                       |
| HHV-6 QUALITATIVE DNA PCR                              | CULTURE & GS, BODY FLUID                    |
| HHV6 QUANT PCR SERUM                                   | CULTURE & SMEAR, AFB                        |
| HHV-6 QUANTITATIVE DNA PCR                             | CULTURE & SMEAR, AFB CF                     |
| HIV-1 CAP/TAQ PCR QUANT                                | CULTURE AEROBIC ANAEROBIC                   |
| HIV-1 CAP/TAQ RNA PCR QUANT                            | CULTURE ANAEROBIC                           |
| HIV-1 DNA PCR QUALITATIVE                              | CULTURE AND GS, WOUND DEEP                  |
| HIV-1 DNA QUALITATIVE PCR                              | CULTURE AND SMEAR, AFB BLOOD                |
| HIV-1 PROVIRAL DNA QUAL PCR, B                         | CULTURE BETA STREP                          |
| HIV-1 RNA QUANTITATIVE PCR                             | CULTURE BLOOD                               |
| HIV-1 VIRAL LOAD                                       | CULTURE CATHETER TIP                        |
| HIV-2 DNA/RNA QUALITATIVE PCR                          | CULTURE CHLAMYDIA                           |
| HSV DNA PCR                                            | CULTURE CMV OTHER                           |
| HSV GROUP IGG SEROLOGY                                 | CULTURE CSF W/ SMEAR                        |
| HSV PCR                                                | CULTURE DIPHTHERIA                          |
| HSV QUANTITATIVE PCR                                   | CULTURE ENDOTRACHEAL ASPIRATE W/ SMEAR      |
| HSV SEROLOGY (EIA)                                     | CULTURE FLUID W/ SMEAR                      |
| HSV TYPING BY REAL-TIME PCR                            | CULTURE FUNGUS BLOOD                        |
| HSV TYPING PCR                                         | CULTURE FUNGUS SKIN W/ SMEAR                |
| HUMAN HERPES VIRUS 6 PCR                               | CULTURE FUNGUS W/ SMEAR                     |
| HUMAN HERPES VIRUS 7 ANTIBODY PANEL                    | CULTURE GC RECTAL                           |
| HUMAN HERPES VIRUS-6 PCR                               | CULTURE GC THROAT                           |

|                                         |                                                          |
|-----------------------------------------|----------------------------------------------------------|
| HUMAN PARECHOVIRUS RNA PCR              | CULTURE GC W/ SMEAR                                      |
| INFLUENZA A PCR SUBTYPING               | CULTURE HERPES SIMPLEX                                   |
| INFLUENZA A RNA PCR                     | CULTURE MISCELLANEOUS W/ SMEAR                           |
| INFLUENZA A VIRUS RNA PCR               | CULTURE MYCOBACTERIUM BLOOD                              |
| INFLUENZA A/B AND RSV PCR               | CULTURE MYCOBACTERIUM W/ SMEAR                           |
| INFLUENZA A/B PCR                       | CULTURE NASOPHARYNGEAL                                   |
| INFLUENZA B VIRUS RNA PCR               | CULTURE SPUTUM CF W/ SMEAR                               |
| JC VIRUS QUALITATIVE PCR                | CULTURE SPUTUM W/ SMEAR                                  |
| JC VIRUS QUANTITATIVE PCR               | CULTURE STOOL (SHIG,SALM,CAMPY,ENT PATH)                 |
| KINGELLA KINGAE PCR                     | CULTURE THROAT                                           |
| LCM VIRUS AB IGG IGM, CSF               | CULTURE TRACHEAL ASPIRATE W/ SMEAR                       |
| LCM VIRUS AB IGG IGM,CSF                | CULTURE URINE                                            |
| LCM VIRUS ANTIBODY,IGG IGM              | CULTURE VIRAL                                            |
| LYME DISEASE SEROLOGY EVALUATION, SERUM | CULTURE WOUND SURFACE                                    |
| LYME DISEASE SEROLOGY, S                | CULTURE WOUND SURFACE & GRAM STAIN                       |
| LYME DNA PCR, BLOOD                     | CULTURE, ABSCESS-ASPIRATE                                |
| LYME DNA PCR, FLUID TISSUE              | CULTURE, ANAEROBIC                                       |
| LYME PCR                                | CULTURE, ANAEROBIC BACTERIA                              |
| MALARIA PCR                             | CULTURE, BACTERIA, BLOOD                                 |
| MEASLES PCR QUAL                        | CULTURE, BACTERIA, CSF WITH GRAM STAIN                   |
| MEASLES SEROLOGY (IGG)                  | CULTURE, BACTERIA, MISCELLANEOUS SOURCES WITH GRAM STAIN |
| MENINGITIS/ ENCEPHALITIS PCR PANEL, CSF | CULTURE, BACTERIA, RESPIRATORY WITH GRAM STAIN           |
| MENINGITIS/ENCEPHALITIS PCR             | CULTURE, BACTERIA, RESPIRATORY, FOR CF PATIENTS          |
| METAPNEUMOVIRUS RNA PCR                 | CULTURE, BACTERIA, STOOL FOR ENTERIC PATHOGENS           |
| MRSA PCR                                | CULTURE, BACTERIA, URINE                                 |
| MUMPS IGG SEROLOGY                      | CULTURE, BLOOD                                           |
| MUMPS SEROLOGY (IGG)                    | CULTURE, BLOOD FUNGAL                                    |
| MUMPS VIRUS AB, IGG AND IGM, S          | CULTURE, BLOOD/SBE                                       |
| MUMPS VIRUS ANTIBODY, IGM               | CULTURE, BLOOD-BONE MARROW                               |
| MUMPS VIRUS RNA PCR                     | CULTURE, CATHETER TIP                                    |
| MYCOPLASMA PNEUMONIAE CULTURE           | CULTURE, EAR                                             |
| MYCOPLASMA PNEUMONIAE DNA, PCR          | CULTURE, EYE                                             |
| MYCOPLASMA PNEUMONIAE PCR               | CULTURE, FLUID (BOTTLE ONLY)                             |
| NEISSERIA GONORRHOEAE CULTURE           | CULTURE, FUNGAL                                          |

|                                                       |                                                  |
|-------------------------------------------------------|--------------------------------------------------|
| NEISSERIA GONORRHOEAE PCR                             | CULTURE, FUNGAL CYSTIC FIBROSIS                  |
| NEISSERIA GONORRHOEAE QUALITATIVE PCR                 | CULTURE, FUNGUS                                  |
| NOROVIRUS PCR                                         | CULTURE, GC                                      |
| NOROVIRUS PCR BATTERY                                 | CULTURE, GC SCREEN                               |
| NOROVIRUS RNA PCR                                     | CULTURE, GENITAL                                 |
| NOROVIRUS, STOOL                                      | CULTURE, GONOCOCCUS SCREEN                       |
| OTHER BACTERIAL CULTURE                               | CULTURE, LOWER RESPIRATORY                       |
| OTHER BACTERIAL CULTURE & GRAM SMEAR                  | CULTURE, MISC PATHOGEN SCREEN                    |
| PARAINFLUENZA TYPE 1 RNA PCR                          | CULTURE, MRSA SCREEN                             |
| PARAINFLUENZA TYPE 2 RNA PCR                          | CULTURE, MYCOBACTERIUM WITH AFB STAIN            |
| PARAINFLUENZA TYPE 3 RNA PCR                          | CULTURE, REFERRED ISOLATE BLOOD                  |
| PARECHOVIRUS RNA PCR                                  | CULTURE, RESPIRATORY CF                          |
| PARVOVIRUS ANTIBODY PANEL                             | CULTURE, RESPIRATORY DEEP                        |
| PARVOVIRUS B19 ANTIBODY IGG                           | CULTURE, RESPIRATORY SPUTUM                      |
| PARVOVIRUS B-19 IGM SEROLOGY                          | CULTURE, RESPIRATORY UPPER                       |
| PARVOVIRUS B19 PCR                                    | CULTURE, STOOL                                   |
| PARVOVIRUS B-19 PCR                                   | CULTURE, STOOL FOR AEROMONAS                     |
| PARVOVIRUS B19 PCR, P                                 | CULTURE, STOOL FOR PLESIOMONAS                   |
| PARVOVIRUS B19, IGG & IGM                             | CULTURE, STOOL FOR SALM/SHIG                     |
| PARVOVIRUS IGG & IGM                                  | CULTURE, STOOL FOR VIBRIO                        |
| PARVOVIRUS IGG AND IGM AB                             | CULTURE, STOOL FOR YERSINIA                      |
| PARVOVIRUS IGG AND IGM AB-COMBO                       | CULTURE, STREP                                   |
| PARVOVIRUS IGG AND IGM SEROLOGY                       | CULTURE, TRICHOMONAS                             |
| PNEUMOCOCCAL(STREP)ANTIBODIES,IGG(16963-Q, 812166-LC) | CULTURE, URINE                                   |
| POCT RAPID STREP                                      | CULTURE, VIRUS                                   |
| POLIOVIRUS NEUTRALIZATION                             | CULTURE, WOUND/EXUDATE                           |
| RAPID STREP - BACK OFFICE                             | CULTURE, YERSINIA, STOOL                         |
| RAPID STREP - BACK OFFICE POCT                        | CULTURE,BLOOD                                    |
| RAPID STREP A (POC)                                   | CULTURE,GASTROINTESTINAL                         |
| RESP ADENOVIRUS PCR                                   | CULTURE,REFERRAL                                 |
| RESP VIRUS PCR PANEL-EXTERNAL REFERRAL ONLY           | CYTOMEGALOVIRUS (CMV) IGG ANTIBODY               |
| RESPIRATORY ADENOVIRUS DNA PCR                        | CYTOMEGALOVIRUS (CMV) IGM ANTIBODY               |
| RESPIRATORY CULTURE                                   | CYTOMEGALOVIRUS AND HERPES SIMPLEX VIRUS CULTURE |
| RESPIRATORY CULTURE AND GRAM SMEAR                    | CYTOMEGALOVIRUS IGG ANTIBODY                     |



|                                                          |                                             |
|----------------------------------------------------------|---------------------------------------------|
| RESPIRATORY PATHOGEN PCR                                 | CYTOMEGALOVIRUS IGM ANTIBODY                |
| RESPIRATORY SYNCYTIAL VIRUS                              | Cytomegalovirus Quant PCR, Stool            |
| RESPIRATORY VIRUS PANEL *DOES NOT INCLUDE INFLUENZA      | CYTOMEGALOVIRUS QUANTITATIVE PCR            |
| RESPIRATORY VIRUS PCR                                    | CYTOMEGALOVIRUS QUANTITATIVE PCR BLOOD      |
| RESPIRATORY VIRUS PCR PANEL                              | DEAC ENTERIC PATHOGENS NAAT                 |
| RHINOVIRUS RNA PCR                                       | DENGUE FEVER VIRUS ABS, IGG AND IGM         |
| ROTAVIRUS ANTIGEN                                        | DENGUE VIRUS AB, IGG AND IGM,S              |
| ROTAVIRUS PCR                                            | DERM SCREEN CULTURE                         |
| RSV QUALITATIVE PCR                                      | DERMATOLOGY SCREEN                          |
| RSV RNA PCR                                              | DERMATOLOGY STAPH/STREP SCREEN              |
| RSV/INFLUENZA PCR ONLY                                   | DERMATOPHYTE CULTURE                        |
| RSV/INFLUENZA PCR WITH REFLEX TO RESPIRATORY VIRAL PANEL | DIALYSATE WORKUP                            |
| RUBELLA IGG SEROLOGY                                     | DIRECT GROUP A STREP TEST, THROAT ONLY      |
| RUBELLA SEROLOGY (IGG)                                   | EAR CULTURE                                 |
| RUBEOLA VIRUS ANTIBODY, IGM AND IGG, SERUM               | EAR CULTURE AND GRAM STAIN                  |
| SALMONELLA-SHIGELLA CULTURE                              | EBV - QUALITATIVE PCR                       |
| STOOL CULTURE                                            | EBV - QUANTITATIVE PCR                      |
| STOOL CULTURE+OVA&P -LC                                  | EBV PCR NON BLOOD                           |
| STREP PNEUMONIAE AB IGG, EIA                             | EBV PCR QUANTITATIVE                        |
| STREPTOCOCCAL AB, S                                      | EBV PCR QUANTITATIVE CSF                    |
| STREPTOCOCCAL ASO ANTIBODIES                             | EBV QUANTITATIVE PCR                        |
| STREPTOCOCCUS PNEUMONIAE ANTIBODY, 23 SEROTYPES, SERUM   | EBV, MOLECULAR DETECTION, TISSUE_BODY FLUID |
| STREPTOZYME SCREEN WITH REFLEX TO TITER                  | ECHOVIRUS ANTIBODY PANEL (CF), SERUM        |
| STREPTOZYME TITER                                        | ENTERIC PATHOGENS NAAT                      |
| TOXOPLASMA GONDII PCR                                    | ENTERO/PARECHO BLOOD BY PCR QUALITATIVE     |
| TOXOPLASMA SEROLOGY (IGG)                                | ENTERO/PARECHO CSF BY PCR QUALITATIVE       |
| TOXOPLASMOSIS IGG SEROLOGY                               | ENTERO/PARECHOVIRUS BY PCR                  |
| TOXOPLASMOSIS SEROLOGY IGG-COMBO                         | ENTEROVIRUS AND PARECHOVIRUS NAAT           |
| TRICHOMONAS VAGINALIS PCR                                | ENTEROVIRUS CULTURE                         |
| UMC C TRACH PCR                                          | ENTEROVIRUS D-68 PCR                        |
| UMC C. TRACHOMATIS CULTURE                               | ENTEROVIRUS PCR                             |
| UMC ENTEROVIRUS PCR, CSF                                 | ENTEROVIRUS PCR QUAL                        |
| UMC GRP A STREPTOCOCCUS DETECTION                        | ENTEROVIRUS QUALITATIVE PCR                 |
| UMC HIV-1 RNA PCR QUANTITATIVE                           | Enterovirus Quant PCR, Stool                |

|                                                  |                                                        |
|--------------------------------------------------|--------------------------------------------------------|
| UMC HSV PCR                                      | ENTEROVIRUS REVERSE TRANSCRIPTASE PCR, BLOOD           |
| UMC PERTUSSIS CULTURE                            | ENTEROVIRUS REVERSE TRANSCRIPTASE PCR, CSF             |
| UMC PERTUSSIS PCR                                | EPSTEIN BARR VIRUS (EBV) PCR (BLOOD)                   |
| UMC RESPIRATORY VIRUS ANTIGEN PANEL              | EPSTEIN-BARR VIRUS (EBV) ANTIBODIES, SERUM             |
| UMC RESPIRATORY VIRUS PCR PANEL                  | EPSTEIN-BARR VIRUS, ANTIBODY TO NUCLEAR ANTIGEN (EBNA) |
| UMC ROTAVIRUS ANTIGEN                            | ERHLICHIA AND ANAPLASMA SPECIES BY PCR                 |
| UREAPLASMA CULTURE                               | EYE CULTURE                                            |
| URINE CULTURE                                    | EYE CULTURE AND GRAM STAIN                             |
| URINE CULTURE & GRAM SMEAR                       | FUNGAL BLOOD CULTURE                                   |
| URINE MACROSCOPIC W/ REFLEX CULTURE              | FUNGAL CULT, GEN-THROAT                                |
| URINE MACROSCOPIC/MICROSCOPIC W/ REFLEX CULTURE  | FUNGAL CULTURE                                         |
| VARICELLA IGG SEROLOGY                           | FUNGAL CULTURE (CYSTIC FIBROSIS)                       |
| VARICELLA PCR                                    | Fungal Culture (Not Blood)                             |
| VARICELLA SEROLOGY (IGG)                         | FUNGAL CULTURE GROUP                                   |
| VARICELLA ZOSTER VIRUS PCR                       | FUNGAL CULTURE SCREEN                                  |
| VARICELLA ZOSTER VIRUS PCR-COMBO                 | FUNGAL CULTURE, MISCELLANEOUS                          |
| VIRAL RAPID ANTIGEN DETECTION                    | FUNGUS CULTURE FOR BLOOD                               |
| VZV PCR QUALITATIVE                              | GC CULTURE                                             |
| WEST NILE VIRUS AB PANEL, CSF                    | GENITAL CULTURE                                        |
| WEST NILE VIRUS ABS, IGG & IGM                   | GI BACTERIAL PANEL                                     |
| WEST NILE VIRUS ANTIBODY PANEL                   | GI FLMARY IMPACT STUDY PANEL                           |
| WEST NILE VIRUS ANTIBODY PANEL CSF               | GI INFECTION ARRAY                                     |
| WEST NILE VIRUS PCR                              | GI PCR (GIP) WITHOUT C.DIFFICILE                       |
| WEST NILE VIRUS QUALITATIVE PCR                  | GI PCR PANEL (GIP) WITH C.DIFFICILE                    |
| WNV RNA PCR                                      | GI PCR PANEL (GIP) WITHOUT C.DIFFICILE                 |
| ZIKA PCR                                         | GROUP A STREP AG DETECTION                             |
| ZIKA VIRUS IGM                                   | GROUP A STREP NAAT                                     |
| ZIKA VIRUS PCR                                   | GROUP A STREP RRNA GENPROBE, THROAT                    |
| ZRAPID HUMAN IMMUNODEFICIENCY VIRUS              | GROUP A STREPTOCOCCUS ANTIBODY PANEL                   |
| POCT RAPID GROUP A STREP MOLECULAR (THROAT ONLY) | GROUP A STREPTOCOCCUS ANTIGEN DETECTION                |
| RAPID GROUP A STREP - MOLECULAR (THROAT ONLY)    | GROUP A STREPTOCOCCUS BY PCR                           |
| POCT SBHC RAPID STREP                            | GROUP A STREPTOCOCCUS CULTURE                          |
| STREPTOCOCCAL ANTIBODIES                         | GROUP A STREPTOCOCCUS MOLECULAR ASSAY                  |
| ZZGROUP A STREPTOCOCCUS ANTIGEN DETECTION        | GROUP B STREP SCREEN                                   |

|                                           |                                                               |
|-------------------------------------------|---------------------------------------------------------------|
| STREP PNEUMONIAE ANTIGENS                 | GROUP B STREPTOCOCCUS SCREEN                                  |
| PARVOVIRUS B-19 IGG SEROLOGY              | GROUP B STREPTOCOCCUS ANTIGEN DETECTION                       |
| MUMPS PCR                                 | HCV RNA PCR QUAL                                              |
| HERPES SIMPLEX VIRUS PCR, BLOOD           | HEPATITIS B PCR QUALITATIVE                                   |
| HSV 1 AND 2 QUANTITATIVE PCR              | HEPATITIS B PCR QUANT                                         |
| KINGELLA KINGAE DNA QUAL PCR              | HEPATITIS B QUALITATIVE PCR                                   |
| HHV 6 PCR                                 | HEPATITIS B QUANTITATIVE PCR                                  |
| BK VIRUS PCR, QUANT, U                    | HEPATITIS B VIRAL DNA DETECTION AND QUANTIFICATION, SERUM     |
| MEASLES PCR                               | HEPATITIS B VIRUS QUANT                                       |
| MEASLES, PCR                              | HEPATITIS C VIRUS RNA QUALITATIVE PCR                         |
| PARVOVIRUS B19 DNA QUANT PCR              | HEPATITIS C, RNA QUANTITATIVE PCR                             |
| CRYPTOSPORIDIUM SP PCR                    | HEPATITIS E IGM                                               |
| ENTEROVIRUS QUANT PCR, STOOL              | HEPATITIS C RNA QUALITATIVE TMA                               |
| HHV6 QUANT PCR PLASMA                     | HERPES SIMPLEX CULTURE                                        |
| HHV6 QUANT RT PCR CSF                     | HERPES SIMPLEX SEROLOGY                                       |
| NOROVIRUS PCR, STOOL                      | HERPES SIMPLEX VIRUS (HSV) MOLECULAR DETECTION, LESION        |
| STAPH AUREUS MRSA/MSSA PCR                | HERPES SIMPLEX VIRUS (HSV), MOLECULAR DETECTION BODY FLUID    |
| ZZZRESPIRATORY VIRUS PCR                  | HERPES SIMPLEX VIRUS (HSV), MOLECULAR DETECTION BODY FLUID    |
| HEPATITIS C VIRUS BY QUANTITATIVE NAAT    | HERPES SIMPLEX VIRUS 1 AND 2 - MOLECULAR DETECTION (LESION)   |
| ROUTINE VIRAL STOOL PATHOGENS - MOLECULAR | HERPES SIMPLEX VIRUS 1 AND 2 (LESION) â€” MOLECULAR DETECTION |
| HEPATITIS C VIRUS QUANT                   | HERPES SIMPLEX VIRUS 1 AND 2, SPINAL FLUID, PCR               |
| PARVOVIRUS IGG/IGM AB-CHOP ONLY           | HERPES SIMPLEX VIRUS CULTURE                                  |
| BK VIRUS IGG ANTIBODY                     | HERPES SIMPLEX VIRUS CULTURE GROUP                            |
| DENGUE VIRUS AB, IGG AND IGM,S            | HERPES SIMPLEX VIRUS DIRECT STAIN W/CULT REFLEX               |
| HEPATITIS C VIRUS GENOTYPE BY SEQUENCING  | HERPES SIMPLEX VIRUS PCR                                      |
| AFB BLOOD CULTURE, ID AND SENSITIVITY     | HERPES SIMPLEX VIRUS PCR, OTHER THAN BLOOD                    |
| CULTURE, STOOL                            | HERPES SIMPLEX VIRUS, SEND OUT, NON-BLOOD                     |
| URINALYSIS W/ REFLEX CULTURE              | HHV6 - QUALITATIVE PCR                                        |
| URINALYSIS, STRIP W/REFLEX CULTURE        | HHV6 - QUANTITATIVE PCR                                       |
| CYTOMEGALOVIRUS IGM                       | HHV6 PCR QUANTITATIVE                                         |
| PARVOVIRUS B19 BY PCR                     | HHV6 Quant PCR Plasma                                         |
| CYTOMEGALOVIRUS AB IGG                    | HHV6 QUANT PCR SERUM                                          |
| ARBOVIRUS AB, ACUTE TITERS                | HHV6 QUANT RT PCR CSF                                         |
| PARVOVIRUS B19 ANTIBODIES                 | HHV-7 DNA QUANT PCR                                           |

|                                              |                                        |
|----------------------------------------------|----------------------------------------|
| WEST NILE VIRUS ANTIBODIES                   | HHV-8 DNA QUAL PCR                     |
| PARVOVIRUS B19 ANTIBODY, IGM                 | HIV VIRAL LOAD-NEONATAL                |
| ADENOVIRUS BY PCR, QUANT                     | HIV-1 DNA PCR QUALITATIVE              |
| BK VIRUS QUANT PCR BLOOD                     | HIV-1 DNA Qualitative PCR              |
| PARVOVIRUS B19 ANTIBODY, IGG                 | HIV-1 DNA, PCR                         |
| HUMAN HERPESVIRUS 6 PCR BLOOD                | HIV-1 QUALITATIVE DNA PCR              |
| ENTEROVIRUS BY PCR                           | HIV-1 QUALITATIVE PCR                  |
| RHINOVIRUS RHV BY PCR                        | HIV-1 QUANTITATIVE RNA PCR             |
| PARAINFLUENZA VIRUS BY PCR                   | HIV-1 RNA BY PCR, QUANTITATIVE         |
| HEPATITIS C VIRUS (HCV) BY QUANTITATIVE NAAT | HIV-1 RNA BY PCR, QUANTITATIVE, PLASMA |
| HUMAN HERPESVIRUS 6 PCR CSF                  | HIV-1 RNA QUANTITATIVE PCR             |
| ENTEROVIRUS D68                              | HIV-1 VIRAL LOAD                       |
| BORDETELLA PERTUSSIS,PARAPERTUSSIS PCR       | HIV-2 DNA/RNA QUALITATIVE PCR          |
| EBV BY PCR, QUANTITATIVE                     | HOLD URINE CULTURE                     |
| KINGELLA KINGAE JOINT FLUID PCR QUAL         | HSV 1 AND 2 QUALITATIVE PCR            |
| HIV DNA BY PCR                               | HSV 1/2 PCR                            |
| CAT SCRATCH PCR BLOOD                        | HSV 1/2 QUALITATIVE PCR                |
| STAPH AUREUS QUAL PCR JOINT FLD              | HSV BLOOD BY PCR QUALITATIVE           |
| STAPH AUREUS QUAL PCR ABSCESS                | HSV BY PCR, SUPERFICIAL SITE           |
| HEPATITIS B DNA BY PCR, QUANT                | HSV BY PCR, TISSUE OR FLUID            |
| CAT SCRATCH PCR, LYMPH NODE                  | HSV CSF BY PCR QUALITATIVE             |
| STAPH AUREUS QUAL PCR RESP                   | HSV CULTURE                            |
| STAPH AUREUS NASAL PCR                       | HSV PCR                                |
| STAPH AUREUS QUAL PCR CSF                    | HSV PCR BLOOD                          |
| LYME SEROLOGY                                | HSV PCR CSF                            |
| POCT DIRECT GROUP A STREP, THROAT            | HSV PCR NON BLOOD                      |
|                                              | HUMAN HERPES VIRUS 6 PCR               |
|                                              | HUMAN HERPESVIRUS 6 PCR QUANT          |
|                                              | HUMAN METAPNEUMOVIRUS NAAT             |
|                                              | HUMAN METAPNEUMOVIRUS PCR              |
|                                              | INDWELLING DEVICE CULTURE              |
|                                              | INFLUENZA A AND B PCR                  |
|                                              | INFLUENZA A B & RSV BY PCR             |
|                                              | INFLUENZA A, B, AND RSV BY PCR         |

|  |                                                         |
|--|---------------------------------------------------------|
|  | INFLUENZA A/B AND RSV PCR                               |
|  | INFLUENZA A/B PCR                                       |
|  | ISOLATOR CULTURE, BLOOD                                 |
|  | IV CATH TIP CULTURE                                     |
|  | JC VIRUS PCR QUAL                                       |
|  | JC VIRUS QUALITATIVE PCR                                |
|  | Kingella kingae DNA Qual PCR                            |
|  | KINGELLA KINGAE PCR                                     |
|  | KINGELLA PCR                                            |
|  | LYMPHOCYTIC CHORIOMENINGITIS VIRUS ANTIBODY, IFA, SERUM |
|  | M. PNEUMO PCR                                           |
|  | MANUAL BLOOD CULTURE                                    |
|  | MEASLES PCR QUAL                                        |
|  | MEASLES VIRUS NAAT                                      |
|  | MENING/ENCEPH INFECTION ARRAY                           |
|  | MENINGITIS/ENCEPHALITIS PCR                             |
|  | MENINGITIS/ENCEPHALITIS PCR PANEL                       |
|  | MIC MCG/ML                                              |
|  | MRSA CULTURE                                            |
|  | MRSA PCR                                                |
|  | MRSA PCR QUAL                                           |
|  | MRSA SA SSTI PCR                                        |
|  | MRSA SCREEN                                             |
|  | MRSA/SA PCR QUALITATIVE                                 |
|  | MUMPS PCR                                               |
|  | MUMPS PCR QUAL                                          |
|  | MUMPS VIRUS ANTIBODY, IGM                               |
|  | MUMPS VIRUS RNA QUALITATIVE, PCR                        |
|  | MUMPS VIRUS RNA, RT-PCR                                 |
|  | MYCOBACTERIAL (AFB) BROTH CULTURE                       |
|  | MYCOBACTERIAL (AFB) CULTURE                             |
|  | MYCOBACTERIAL (AFB) GROUP                               |
|  | MYCOBACTERIAL BLOOD CULTURE                             |
|  | MYCOBACTERIAL CULTURE (CYSTIC FIBROSIS)                 |

|  |                                               |
|--|-----------------------------------------------|
|  | MYCOBACTERIAL GROUP                           |
|  | MYCOBACTERIUM TUBERCULOSIS PCR                |
|  | MYCOPLASMA CULTURE                            |
|  | MYCOPLASMA NAAT                               |
|  | MYCOPLASMA PNEUMONIAE BY PCR                  |
|  | MYCOPLASMA PNEUMONIAE CSF BY PCR, QUAL        |
|  | MYCOPLASMA PNEUMONIAE CULTURE                 |
|  | MYCOPLASMA PNEUMONIAE DNA(PCR)                |
|  | MYCOPLASMA PNEUMONIAE DNA, PCR                |
|  | MYCOPLASMA PNEUMONIAE PCR                     |
|  | MYCOPLASMA PNEUMONIAE PCR QUAL                |
|  | NEISSERIA GONORRHOEAE CULTURE                 |
|  | NEISSERIA GONORRHOEAE CULTURE-COMBO           |
|  | NEISSERIA GONORRHOEAE PCR                     |
|  | NEISSERIA GONORRHOEAE QUALITATIVE PCR         |
|  | NEISSERIA MENINGITIDIS CSF PCR, QUAL          |
|  | NOROVIRUS PCR                                 |
|  | NOROVIRUS PCR BATTERY                         |
|  | NOROVIRUS PCR, STOOL                          |
|  | NOROVIRUS RNA, RT PCR                         |
|  | NP CULTURE                                    |
|  | ORASURE HIV SCREEN (ER ONLY)                  |
|  | Other Bacterial Culture                       |
|  | OTHER BACTERIAL CULTURE & GRAM SMEAR          |
|  | PARAINFLUENZA 1, 2, 3 PCR                     |
|  | PARECHOVIRUS PCR                              |
|  | PARECHOVIRUS PCR QUAL                         |
|  | PARVOVIRUS - QUANTITATIVE PCR                 |
|  | PARVOVIRUS AB PANEL                           |
|  | PARVOVIRUS B19 ANTIBODIES, IGG AND IGM, SERUM |
|  | Parvovirus B19 DNA Quant PCR                  |
|  | PARVOVIRUS B19 PCR                            |
|  | PARVOVIRUS B-19 PCR                           |
|  | PARVOVIRUS B19 PCR, P                         |

|  |                                                    |
|--|----------------------------------------------------|
|  | PARVOVIRUS B19, MOLECULAR DETECTION, PLASMA        |
|  | PERIANAL (FOR STAPH AND STREP ONLY) CULTURE        |
|  | PERTUSSIS PCR                                      |
|  | PERTUSSIS PCR QUAL                                 |
|  | QUANTITATIVE RESPIRATORY CULTURE & GRAM STAIN, BAL |
|  | RAPID ADENOVIRUS CULTURE                           |
|  | RAPID CMV CULTURE                                  |
|  | RAPID FLU A/B PCR                                  |
|  | RAPID GROUP A STREPTOCOCCUS ANTIGEN                |
|  | RAPID GROUP A STREPTOCOCCUS TEST                   |
|  | RAPID HSV CULTURE                                  |
|  | RAPID ORGANISM ID PANEL (BCID)                     |
|  | RAPID STREP ANTIGEN (HOSP)                         |
|  | RAPID STREP SCREEN W/ REFLEX CULTURE               |
|  | RAPID STREP SCREEN W/ REFLEX GROUP A STREP NAAT    |
|  | RAPID STREP(HOSP)                                  |
|  | RAPID STREP(HOSP)-COMBO                            |
|  | RESP SWAB WORKUP                                   |
|  | RESPIRATORY (QUANTITATIVE) CULTURE AND GRAM STAIN  |
|  | RESPIRATORY BACTERIAL GROUP                        |
|  | RESPIRATORY CF CULTURE                             |
|  | RESPIRATORY CULTURE                                |
|  | RESPIRATORY CULTURE (CYSTIC FIBROSIS)              |
|  | RESPIRATORY CULTURE AND GRAM SMEAR                 |
|  | RESPIRATORY CULTURE AND GRAM STAIN                 |
|  | RESPIRATORY INFECTION ARRAY                        |
|  | RESPIRATORY PANEL PCR                              |
|  | RESPIRATORY PANEL, PCR                             |
|  | RESPIRATORY PATHOGEN PCR                           |
|  | RESPIRATORY PATHOGEN PCR PANEL                     |
|  | RESPIRATORY VIRAL PCR                              |
|  | RESPIRATORY VIRUS PCR                              |
|  | RHINOVIRUS NAAT QUANTITATIVE                       |
|  | RHINOVIRUS PCR                                     |

|  |                                             |
|--|---------------------------------------------|
|  | ROTAVIRUS ANTIGEN                           |
|  | ROTAVIRUS ANTIGEN, FECES, RAPID             |
|  | ROTAVIRUS, STOOL                            |
|  | RSV AND INFLUENZA A AND B NAAT              |
|  | RSV BY PCR, NONNP                           |
|  | RSV NAAT                                    |
|  | RSV PCR                                     |
|  | RSV QUALITATIVE PCR                         |
|  | RUBEOLA VIRUS ANTIBODY, IGM AND IGG, SERUM  |
|  | SALMONELLA-SHIGELLA CULTURE                 |
|  | SBE BLOOD CULTURE                           |
|  | SECOND AEROBIC BLOOD CULTURE                |
|  | SHUNT BROTH PCR PANEL                       |
|  | SHUNT CULTURE GROUP                         |
|  | STANDARD VIRAL CULTURE                      |
|  | Staph aureus MRSA/MSSA PCR                  |
|  | STAPH SCREEN CULTURE                        |
|  | STOOL BACTERIAL PATHOGEN GROUP              |
|  | STOOL CULTURE                               |
|  | STREP A MOLECULAR DETECTION - THROAT ONLY   |
|  | STREP A ONLY CULTURE                        |
|  | STREP A REFLEX GROUP                        |
|  | STREP B ONLY CULTURE                        |
|  | STREP PNEUMONIAE ANTIGEN                    |
|  | STREP PNEUMONIAE SEROTYPING                 |
|  | STREP SCREEN (AG - NEG)                     |
|  | STREPTOCOCCUS GRP A DNA                     |
|  | STREPTOCOCCUS PNEUMONIAE BLOOD BY PCR, QUAL |
|  | STREPTOCOCCUS PNEUMONIAE CSF BY PCR, QUAL   |
|  | STREPTOCOCCUS PNEUMONIAE PCR                |
|  | STREPTOZYME                                 |
|  | SYNDROMIC RESPIRATORY PCR PANEL             |
|  | THROAT CULTURE                              |
|  | THROAT CULTURE FOR GROUP A STREP            |



|  |                                        |
|--|----------------------------------------|
|  | TISSUE BROTH PCR PANEL                 |
|  | TISSUE BROTH WORKUP                    |
|  | TISSUE CULTURE                         |
|  | TISSUE CULTURE AND GRAM STAIN          |
|  | TISSUE CULTURE CHARGE                  |
|  | TISSUE CULTURE GROUP                   |
|  | TOXOPLASMA GONDII PCR                  |
|  | TOXOPLASMA GONDII QUAL PCR             |
|  | TOXOPLASMA PCR                         |
|  | TRANSFUSION RX WORKUP                  |
|  | TRANSPLANT RESPIRATORY PANEL NAAT      |
|  | TRICHOMONAS PCR                        |
|  | TRICHOMONAS PREP                       |
|  | TRICHOMONAS VAGINALIS PCR              |
|  | UMC C TRACH PCR                        |
|  | UMC C. TRACHOMATIS CULTURE             |
|  | UMC ENTEROVIRUS PCR, CSF               |
|  | UMC Grp A Streptococcus Detection      |
|  | UMC HIV-1 RNA PCR QUANTITATIVE         |
|  | UMC HSV PCR                            |
|  | UMC PERTUSSIS CULTURE                  |
|  | UMC PERTUSSIS PCR                      |
|  | UMC RESPIRATORY VIRUS PCR PANEL        |
|  | UREAPLASMA, MYCOPLASMA CULTURE         |
|  | URINALYSIS W/REFLEX TO CULTURE         |
|  | URINE BACTERIAL CULTURE                |
|  | URINE CULTURE                          |
|  | URINE CULTURE - CATHETER OR SUPRAPUBIC |
|  | URINE CULTURE & GRAM SMEAR             |
|  | URINE CULTURE (STRAIGHT CATH)          |
|  | URINE CULTURE (SUPRAPUBIC)             |
|  | URINE CULTURE CLEAN CATCH / BAG        |
|  | VAGINAL BACTERIAL GROUP                |
|  | VAGINAL PATHOGEN SCREEN                |

|  |                                                                |
|--|----------------------------------------------------------------|
|  | VANCOMYCIN RESISTANT ENTEROCOCCUS CULTURE STOOL OR RECTAL SWAB |
|  | VARICELLA PCR NON BLOOD                                        |
|  | VARICELLA-ZOSTER VIRUS (VZV) ANTIBODY, IGG, SERUM              |
|  | VARICELLA-ZOSTER VIRUS (VZV) ANTIBODY, IGM                     |
|  | VARICELLA-ZOSTER VIRUS " MOLECULAR DETECTION (LESION)          |
|  | VARICELLA-ZOSTER VIRUS PCR                                     |
|  | VIRAL CULTURE                                                  |
|  | VIRAL CULTURE (BMT URINE)                                      |
|  | VIRAL PCR PANEL - HEART INSTITUTE CARDIOLOGY TESTING           |
|  | VIRAL RESPIRATORY CULTURE                                      |
|  | VIRUS CULTURE                                                  |
|  | VIRUS CULTURE, RESPIRATORY                                     |
|  | VIRUS CULTURE, TISSUE                                          |
|  | VIRUS ELECTRON MICROSCOPY STOOL                                |
|  | VRE SCREEN CULTURE                                             |
|  | VZV BLOOD BY PCR, QUALITATIVE                                  |
|  | VZV BY PCR, FLUID OR TISSUE                                    |
|  | VZV BY PCR, SUPERFICIAL SITE                                   |
|  | VZV CSF BY PCR, QUALITATIVE                                    |
|  | VZV CULTURE                                                    |
|  | VZV DIRECT STAIN W/PCR REFLEX                                  |
|  | VZV PCR                                                        |
|  | VZV PCR QUALITATIVE                                            |
|  | WEST NILE VIRUS ABS, IGG AND IGM BY ELISA, CSF                 |
|  | WEST NILE VIRUS QUALITATIVE PCR                                |
|  | WOUND CULTURE AND GRAM STAIN                                   |
|  | ZZGROUP A STREPTOCOCCUS ANTIGEN DETECTION                      |
|  | ZZZRESPIRATORY VIRUS PCR                                       |

**eTable 2: ED-pSOFA: Adapted definitions of pSOFA elements based on emergency department data. If element was not measured, it was assumed normal and was assigned 0 points.**

|                                    | 0                                                            | 1                                                                 | 2                                                                    | 3                                                | 4                                             |
|------------------------------------|--------------------------------------------------------------|-------------------------------------------------------------------|----------------------------------------------------------------------|--------------------------------------------------|-----------------------------------------------|
| <b>Respiratory</b>                 |                                                              |                                                                   |                                                                      |                                                  |                                               |
| SpO <sub>2</sub> :FiO <sub>2</sub> | ≥292<br>regardless of<br>mechanical<br>ventilation<br>status | <292 to ≥264<br>regardless of<br>mechanical<br>ventilation status | <264 to ≥221<br>regardless of<br>mechanical<br>ventilation<br>status | <221 to ≥148<br>AND<br>mechanical<br>ventilation | <148 and<br>mechanical<br>ventilation         |
| <b>Coagulation</b>                 |                                                              |                                                                   |                                                                      |                                                  |                                               |
| Platelet (x1000)                   | ≥150                                                         | 100-149                                                           | 50-99                                                                | 20-49                                            | <20                                           |
| <b>Hepatic</b>                     |                                                              |                                                                   |                                                                      |                                                  |                                               |
| Bilirubin (mg/dL)                  | <1.2                                                         | 1.2-1.9                                                           | 2.0-5.9                                                              | 6.0-11.9                                         | >12.0                                         |
| <b>Cardiovascular</b>              |                                                              |                                                                   |                                                                      |                                                  |                                               |
| MAP, by age                        |                                                              |                                                                   |                                                                      |                                                  |                                               |
| 0-<1 mo                            | ≤46                                                          | <46                                                               | Dopamine ≤5<br>or dobutamine                                         | Dopamine >5 or<br>epi ≤0.1 or<br>norepi ≤0.1     | Dopamine >15<br>or epi >0.1 or<br>norepi >0.1 |
| 1 - <12 mo                         | ≤55                                                          | <55                                                               |                                                                      |                                                  |                                               |
| 12-<24mo                           | ≤60                                                          | <60                                                               |                                                                      |                                                  |                                               |
| 24-<60 mo                          | ≤62                                                          | <62                                                               |                                                                      |                                                  |                                               |
| 60-<144 mo                         | ≤65                                                          | <65                                                               |                                                                      |                                                  |                                               |
| 144-<216 mo                        | ≤67                                                          | <67                                                               |                                                                      |                                                  |                                               |
| >216 mo                            | ≤70                                                          | <70                                                               |                                                                      |                                                  |                                               |
| <b>Neurologic</b>                  | 15                                                           | 13-14                                                             | 10-12                                                                | 6-9                                              | <6                                            |
| Glasgow Coma Score                 |                                                              |                                                                   |                                                                      |                                                  |                                               |
| <b>Renal</b>                       |                                                              |                                                                   |                                                                      |                                                  |                                               |
| Creatinine, by age                 |                                                              |                                                                   |                                                                      |                                                  |                                               |
| 0-<1 mo                            | <0.8                                                         | 0.8-0.9                                                           | 1.0-1.1                                                              | 1.2-1.5                                          | ≥1.6                                          |
| 1 - <12 mo                         | <0.3                                                         | 0.3-0.4                                                           | 0.5-0.7                                                              | 0.8-1.1                                          | ≥1.2                                          |
| 12-<24mo                           | <0.4                                                         | 0.4-0.5                                                           | 0.6-1.0                                                              | 1.1-1.4                                          | ≥1.5                                          |
| 24-<60 mo                          | <0.6                                                         | 0.6-0.8                                                           | 0.9-1.5                                                              | 1.6-2.2                                          | ≥2.3                                          |
| 60-<144 mo                         | <0.7                                                         | 0.7-1.0                                                           | 1.1-1.7                                                              | 1.8-2.5                                          | ≥2.6                                          |
| 144-<216 mo                        | <1.0                                                         | 1.0-1.6                                                           | 1.7-2.8                                                              | 2.9-4.1                                          | ≥4.2                                          |
| >216 mo                            | <1.2                                                         | 1.2-1.9                                                           | 2.0-3.4                                                              | 3.5-4.9                                          | ≥5.0                                          |

Variable specific missing-ness is detailed in Supplemental Table 3

eTable 3: Contributions to pSOFA points by element

|                                                             | pSOFA Score             |                             |                           |                           |                            |                           |
|-------------------------------------------------------------|-------------------------|-----------------------------|---------------------------|---------------------------|----------------------------|---------------------------|
|                                                             | Overall<br>(N = 126250) | 2 through 4<br>(N = 118312) | 5 through 7<br>(N = 7059) | 8 through 10<br>(N = 766) | 11 through 13<br>(N = 102) | 14 through 16<br>(N = 11) |
| <b>pSOFA points for lowest SpO2:FiO2 ratio</b>              |                         |                             |                           |                           |                            |                           |
| 0                                                           | 55533 (44.0%)           | 51221 (43.3%)               | 4110 (58.2%)              | 184 (24.0%)               | 18 (17.6%)                 | 0 (0.0%)                  |
| 1                                                           | 633 (0.5%)              | 586 (0.5%)                  | 44 (0.6%)                 | 3 (0.4%)                  | 0 (0.0%)                   | 0 (0.0%)                  |
| 2                                                           | 66900 (53.0%)           | 64997 (54.9%)               | 1738 (24.6%)              | 157 (20.5%)               | 6 (5.9%)                   | 2 (18.2%)                 |
| 3                                                           | 898 (0.7%)              | 611 (0.5%)                  | 220 (3.1%)                | 54 (7.0%)                 | 11 (10.8%)                 | 2 (18.2%)                 |
| 4                                                           | 2286 (1.8%)             | 897 (0.8%)                  | 947 (13.4%)               | 368 (48.0%)               | 67 (65.7%)                 | 7 (63.6%)                 |
| <b>Lowest SpO2:FiO2 ratio:<br/>median (q1 q3)</b>           | 154.0 (98.0 211.1)      | 155.7 (98.0 208.9)          | 121.2 (98.0 276.9)        | 100.0 (96.0 142.9)        | 100.0 (91.0 121.2)         | 106.7 (97.0 200.0)        |
| <b>Mechanical ventilation or intubation</b>                 |                         |                             |                           |                           |                            |                           |
| No                                                          | 120345 (95.3%)          | 114722 (97.0%)              | 5353 (75.8%)              | 257 (33.6%)               | 13 (12.7%)                 | 0 (0.0%)                  |
| Yes                                                         | 5905 (4.7%)             | 3590 (3.0%)                 | 1706 (24.2%)              | 509 (66.4%)               | 89 (87.3%)                 | 11 (100.0%)               |
| <b>pSOFA points for lowest platelet count</b>               |                         |                             |                           |                           |                            |                           |
| 0                                                           | 106748 (84.6%)          | 102051 (86.3%)              | 4181 (59.2%)              | 466 (60.8%)               | 47 (46.1%)                 | 3 (27.3%)                 |
| 1                                                           | 4737 (3.8%)             | 4085 (3.5%)                 | 587 (8.3%)                | 56 (7.3%)                 | 8 (7.8%)                   | 1 (9.1%)                  |
| 2                                                           | 6772 (5.4%)             | 6042 (5.1%)                 | 637 (9.0%)                | 76 (9.9%)                 | 16 (15.7%)                 | 1 (9.1%)                  |
| 3                                                           | 3935 (3.1%)             | 3322 (2.8%)                 | 523 (7.4%)                | 71 (9.3%)                 | 17 (16.7%)                 | 2 (18.2%)                 |
| 4                                                           | 4058 (3.2%)             | 2812 (2.4%)                 | 1131 (16.0%)              | 97 (12.7%)                | 14 (13.7%)                 | 4 (36.4%)                 |
| <b>Lowest Platelet Count<br/>Assessment: median (q1 q3)</b> | 239.0 (97.0 345.0)      | 246.0 (107.0 349.0)         | 169.0 (41.0 306.0)        | 187.0 (49.0 315.0)        | 93.0 (30.0 244.0)          | 34.0 (12.0 187.0)         |
| <b>pSOFA points for highest bilirubin</b>                   |                         |                             |                           |                           |                            |                           |
| 0                                                           | 102308 (81.0%)          | 97197 (82.2%)               | 4515 (64.0%)              | 519 (67.8%)               | 72 (70.6%)                 | 5 (45.5%)                 |
| 1                                                           | 3857 (3.1%)             | 3321 (2.8%)                 | 461 (6.5%)                | 65 (8.5%)                 | 9 (8.8%)                   | 1 (9.1%)                  |
| 2                                                           | 8063 (6.4%)             | 7343 (6.2%)                 | 619 (8.8%)                | 86 (11.2%)                | 14 (13.7%)                 | 1 (9.1%)                  |
| 3                                                           | 4166 (3.3%)             | 3746 (3.2%)                 | 379 (5.4%)                | 36 (4.7%)                 | 2 (2.0%)                   | 3 (27.3%)                 |
| 4                                                           | 7856 (6.2%)             | 6705 (5.7%)                 | 1085 (15.4%)              | 60 (7.8%)                 | 5 (4.9%)                   | 1 (9.1%)                  |

|                                                                | pSOFA Score             |                             |                           |                           |                            |                           |
|----------------------------------------------------------------|-------------------------|-----------------------------|---------------------------|---------------------------|----------------------------|---------------------------|
|                                                                | Overall<br>(N = 126250) | 2 through 4<br>(N = 118312) | 5 through 7<br>(N = 7059) | 8 through 10<br>(N = 766) | 11 through 13<br>(N = 102) | 14 through 16<br>(N = 11) |
| <b>Highest bilirubin Assessment:</b> median (q1 q3)            | 1.7 (0.5 8.3)           | 1.8 (0.5 8.3)               | 1.4 (0.5 10.3)            | 1.0 (0.4 3.3)             | 0.8 (0.4 2.3)              | 3.3 (1.1 8.0)             |
| <b>pSOFA points for lowest GCS score</b>                       |                         |                             |                           |                           |                            |                           |
| 0                                                              | 111422 (88.3%)          | 106447 (90.0%)              | 4679 (66.3%)              | 274 (35.8%)               | 21 (20.6%)                 | 1 (9.1%)                  |
| 1                                                              | 5734 (4.5%)             | 5214 (4.4%)                 | 467 (6.6%)                | 48 (6.3%)                 | 3 (2.9%)                   | 2 (18.2%)                 |
| 2                                                              | 5103 (4.0%)             | 4492 (3.8%)                 | 554 (7.8%)                | 43 (5.6%)                 | 13 (12.7%)                 | 1 (9.1%)                  |
| 3                                                              | 2772 (2.2%)             | 1738 (1.5%)                 | 861 (12.2%)               | 153 (20.0%)               | 20 (19.6%)                 | 0 (0.0%)                  |
| 4                                                              | 1219 (1.0%)             | 421 (0.4%)                  | 498 (7.1%)                | 248 (32.4%)               | 45 (44.1%)                 | 7 (63.6%)                 |
| <b>Lowest GCS total score during the visit:</b> median (q1 q3) | 15.0 (14.0 15.0)        | 15.0 (14.0 15.0)            | 13.0 (8.0 15.0)           | 6.0 (3.0 11.0)            | 5.5 (3.0 10.0)             | 3.0 (3.0 10.0)            |
| <b>pSOFA points for highest creatinine assessment</b>          |                         |                             |                           |                           |                            |                           |
| 0                                                              | 111757 (88.5%)          | 106204 (89.8%)              | 5043 (71.4%)              | 459 (59.9%)               | 48 (47.1%)                 | 3 (27.3%)                 |
| 1                                                              | 8107 (6.4%)             | 7006 (5.9%)                 | 956 (13.5%)               | 126 (16.4%)               | 16 (15.7%)                 | 3 (27.3%)                 |
| 2                                                              | 3600 (2.9%)             | 3196 (2.7%)                 | 314 (4.4%)                | 78 (10.2%)                | 11 (10.8%)                 | 1 (9.1%)                  |
| 3                                                              | 847 (0.7%)              | 660 (0.6%)                  | 138 (2.0%)                | 35 (4.6%)                 | 12 (11.8%)                 | 2 (18.2%)                 |
| 4                                                              | 1939 (1.5%)             | 1246 (1.1%)                 | 608 (8.6%)                | 68 (8.9%)                 | 15 (14.7%)                 | 2 (18.2%)                 |
| <b>Highest creatinine Assessment:</b> median (q1 q3)           | 0.4 (0.3 0.6)           | 0.4 (0.3 0.6)               | 0.4 (0.3 0.8)             | 0.6 (0.3 1.1)             | 0.6 (0.4 1.7)              | 0.7 (0.6 2.9)             |
| <b>pSOFA points for lowest MAP value</b>                       |                         |                             |                           |                           |                            |                           |
| 0                                                              | 98564 (78.1%)           | 95317 (80.6%)               | 2985 (42.3%)              | 250 (32.6%)               | 12 (11.8%)                 | 0 (0.0%)                  |
| 1                                                              | 26523 (21.0%)           | 22502 (19.0%)               | 3655 (51.8%)              | 336 (43.9%)               | 28 (27.5%)                 | 2 (18.2%)                 |
| 2                                                              | 232 (0.2%)              | 141 (0.1%)                  | 69 (1.0%)                 | 20 (2.6%)                 | 1 (1.0%)                   | 1 (9.1%)                  |
| 3                                                              | 712 (0.6%)              | 305 (0.3%)                  | 283 (4.0%)                | 89 (11.6%)                | 30 (29.4%)                 | 5 (45.5%)                 |
| 4                                                              | 219 (0.2%)              | 47 (0.0%)                   | 67 (0.9%)                 | 71 (9.3%)                 | 31 (30.4%)                 | 3 (27.3%)                 |
| <b>Vasoactive infusion administered during ED visit</b>        |                         |                             |                           |                           |                            |                           |
| No                                                             | 125077 (99.1%)          | 117815 (99.6%)              | 6635 (94.0%)              | 586 (76.5%)               | 40 (39.2%)                 | 1 (9.1%)                  |

|                                                         | pSOFA Score             |                             |                           |                           |                            |                           |
|---------------------------------------------------------|-------------------------|-----------------------------|---------------------------|---------------------------|----------------------------|---------------------------|
|                                                         | Overall<br>(N = 126250) | 2 through 4<br>(N = 118312) | 5 through 7<br>(N = 7059) | 8 through 10<br>(N = 766) | 11 through 13<br>(N = 102) | 14 through 16<br>(N = 11) |
| Yes                                                     | 1173 (0.9%)             | 497 (0.4%)                  | 424 (6.0%)                | 180 (23.5%)               | 62 (60.8%)                 | 10 (90.9%)                |
| <b>Lowest MAP value during ED visit:</b> median (q1 q3) | 70.0 (62.0 78.7)        | 70.7 (62.7 79.0)            | 60.7 (51.3 70.0)          | 57.3 (46.7 67.3)          | 48.0 (38.0 56.0)           | 42.3 (38.7 52.0)          |

| pSOFA Component presence: non-deaths |                    |                    |                    |                    |                    |                       |                     |
|--------------------------------------|--------------------|--------------------|--------------------|--------------------|--------------------|-----------------------|---------------------|
| Counts per visit                     | SpO2:FiO2          | Platelet           | Bilirubin          | Glasgow Coma Score | Creatinine         | Vasoactive medication | Mean blood pressure |
| 0 times                              | 3523290<br>(88.1%) | 3591904<br>(89.8%) | 3813986<br>(95.4%) | 3392438<br>(84.8%) | 3666779<br>(91.7%) | 3997376<br>(99.9%)    | 1068054<br>(26.7%)  |
| 1 time                               | 168586<br>(4.2%)   | 371217<br>(9.3%)   | 118303<br>(3.0%)   | 372213<br>(9.3%)   | 301295<br>(7.5%)   | 616<br>(0.02%)        | 1906270<br>(47.7%)  |
| 2 times                              | 79543<br>(2.0%)    | 30339<br>(0.8%)    | 42616<br>(1.1%)    | 148018<br>(3.7%)   | 23291<br>(0.6%)    | 225<br>(0.01%)        | 526589<br>(13.2%)   |
| 3 times                              | 55143<br>(1.4%)    | 1837<br>(0.1%)     | 8013<br>(0.2%)     | 49225<br>(1.2%)    | 2998<br>(0.1%)     | 102<br>(0.00%)        | 205170<br>(5.1%)    |
| 4 or more times                      | 171852<br>(4.3%)   | 3117<br>(0.1%)     | 15496<br>(0.4%)    | 36520<br>(0.9%)    | 4051<br>(0.1%)     | 95<br>(0.00%)         | 292331<br>(7.3%)    |

| pSOFA Component presence: in-hospital deaths |                |                |                |                    |                |                       |                     |
|----------------------------------------------|----------------|----------------|----------------|--------------------|----------------|-----------------------|---------------------|
| Counts per visit                             | SpO2:FiO2      | Platelet       | Bilirubin      | Glasgow Coma Score | Creatinine     | Vasoactive medication | Mean blood pressure |
| 0 times                                      | 678<br>(60.9%) | 330<br>(29.6%) | 600<br>(53.9%) | 682<br>(61.2%)     | 409<br>(36.7%) | 971<br>(87.2%)        | 185<br>(16.6%)      |
| 1 time                                       | 78<br>(7.0%)   | 644<br>(57.8%) | 312<br>(28.0%) | 276<br>(24.8%)     | 629<br>(56.5%) | 60<br>(5.4%)          | 96<br>(8.6%)        |
| 2 times                                      | 56<br>(5.0%)   | 126<br>(11.3%) | 94<br>(8.4%)   | 86<br>(7.7%)       | 60<br>(5.4%)   | 47<br>(4.2%)          | 122<br>(11.0%)      |
| 3 times                                      | 45<br>(4.0%)   | 7<br>(0.6%)    | 33<br>(2.9%)   | 26 (2.3%)          | 9<br>(0.8%)    | 11<br>(1.0%)          | 100<br>(9.0%)       |
| 4 or more times                              | 257<br>(23.1%) | 7<br>(0.6%)    | 75 (6.7%)      | 44<br>(3.9%)       | 7<br>(0.6%)    | 25<br>(2.2%)          | 611<br>(54.9%)      |

eTable4: Presence of each element of pSOFA in survivors and non survivors.

a.eTable 5: a. Area under the curve analysis for each pSOFA cutpoint truncated at 13 b. Graph of ROC curve for each pSOFA cutpoint truncated at 13  
 Predictor Cutoff Analysis with Cluster-robust Confidence Intervals  
 N = 3,999,528

| pSOFA Cutoff                                                             | Deaths | Sensitivity          | Specificity          | Positive Predictive Value | Negative Predictive Value | Positive Likelihood Ratio     | Negative Likelihood Ratio |
|--------------------------------------------------------------------------|--------|----------------------|----------------------|---------------------------|---------------------------|-------------------------------|---------------------------|
| ≥ 1                                                                      | 834    | 0.749 (0.722, 0.773) | 0.921 (0.920, 0.921) | 0.003 (0.002, 0.003)      | 1 (1, 1)                  | 9.448 (9.120, 9.775)          | 0.273 (0.245, 0.301)      |
| ≥ 2                                                                      | 720    | 0.646 (0.618, 0.674) | 0.969 (0.968, 0.969) | 0.006 (0.005, 0.006)      | 1 (1, 1)                  | 20.587 (19.672, 21.501)       | 0.365 (0.336, 0.394)      |
| ≥ 3                                                                      | 603    | 0.541 (0.512, 0.571) | 0.988 (0.988, 0.988) | 0.012 (0.011, 0.013)      | 1 (1, 1)                  | 44.654 (42.156, 47.151)       | 0.464 (0.434, 0.494)      |
| ≥ 4                                                                      | 490    | 0.440 (0.411, 0.469) | 0.994 (0.994, 0.994) | 0.020 (0.018, 0.021)      | 1 (1, 1)                  | 71.832 (66.880, 76.784)       | 0.564 (0.534, 0.593)      |
| ≥ 5                                                                      | 376    | 0.338 (0.310, 0.366) | 0.998 (0.998, 0.998) | 0.047 (0.043, 0.052)      | 1 (1, 1)                  | 178.465 (162.838, 194.093)    | 0.664 (0.636, 0.692)      |
| ≥ 6                                                                      | 267    | 0.240 (0.215, 0.266) | 0.999 (0.999, 0.999) | 0.081 (0.072, 0.091)      | 1 (1, 1)                  | 315.136 (279.607, 350.664)    | 0.761 (0.736, 0.786)      |
| ≥ 7                                                                      | 209    | 0.188 (0.166, 0.212) | 1.000 (1.000, 1.000) | 0.120 (0.105, 0.136)      | 1 (1, 1)                  | 489.016 (423.686, 554.347)    | 0.813 (0.790, 0.836)      |
| ≥ 8                                                                      | 141    | 0.127 (0.108, 0.147) | 1.000 (1.000, 1.000) | 0.160 (0.138, 0.186)      | 1 (1, 1)                  | 685.749 (568.758, 802.741)    | 0.874 (0.854, 0.893)      |
| ≥ 9                                                                      | 92     | 0.083 (0.068, 0.100) | 1.000 (1.000, 1.000) | 0.221 (0.184, 0.263)      | 1 (1, 1)                  | 1019.167 (791.050, 1247.284)  | 0.917 (0.901, 0.934)      |
| ≥ 10                                                                     | 57     | 0.051 (0.040, 0.066) | 1.000 (1.000, 1.000) | 0.288 (0.229, 0.354)      | 1 (1, 1)                  | 1450.970 (1014.482, 1887.457) | 0.949 (0.936, 0.962)      |
| ≥ 11                                                                     | 34     | 0.031 (0.022, 0.042) | 1.000 (1.000, 1.000) | 0.301 (0.224, 0.391)      | 1 (1, 1)                  | 1544.736 (929.621, 2159.852)  | 0.969 (0.959, 0.980)      |
| ≥ 12                                                                     | 19     | 0.017 (0.011, 0.027) | 1.000 (1.000, 1.000) | 0.413 (0.281, 0.559)      | 1 (1, 1)                  | 2525.762 (1049.601, 4001.922) | 0.983 (0.975, 0.991)      |
| ≥ 13 <sup>1</sup>                                                        | 12     | 0.011 (0.006, 0.019) | 1.000 (1.000, 1.000) | 0.500 (0.310, 0.690)      | 1 (1, 1)                  | 3589.241 (723.621, 6454.860)  | 0.989 (0.983, 0.995)      |
| *All pSOFA cutoffs are compared to values less than the displayed cutoff |        |                      |                      |                           |                           |                               |                           |
| <sup>1</sup> The maximum pSOFA was truncated at 13                       |        |                      |                      |                           |                           |                               |                           |



b.

**ROC curve for pSOFA score truncated at 13 vs. in-hospital deaths**  
(N = 3999528)

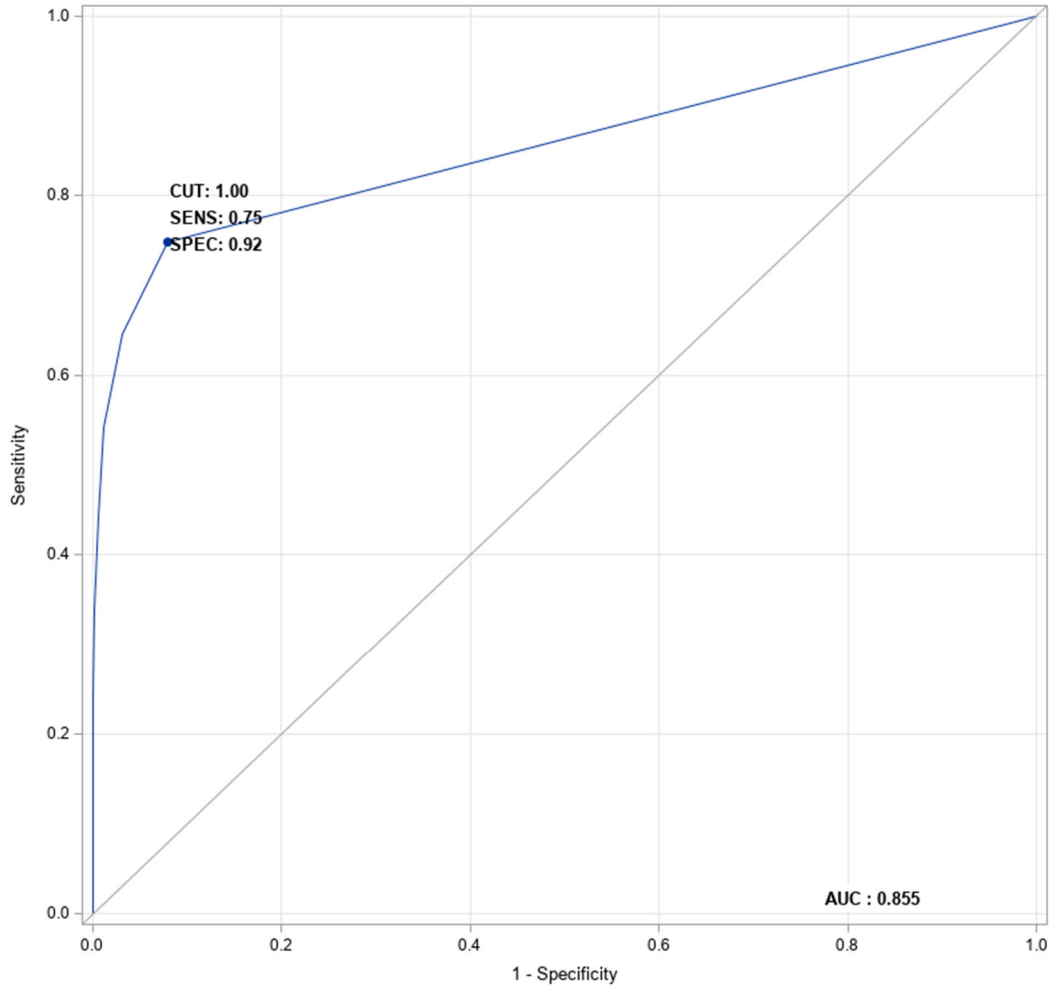

eTable 6: Test characteristics of pSOFA  $\geq 2$  as predictor of in-hospital mortality for all ED patients when ED deaths are included

| Test Characteristic       | % (95% CI)           |
|---------------------------|----------------------|
| Sensitivity               | 0.45 (0.43, 0.47)    |
| Specificity               | 0.97 (0.97, 0.97)    |
| Positive Predictive Value | 0.007 (0.006, 0.007) |
| Negative Predictive Value | 1.0 (1.0, 1.0)       |
| Positive Likelihood Ratio | 14.31 (13.58, 15.04) |
| Negative Likelihood Ratio | 0.57(0.55, 0.59)     |
| Area Under ROC Curve      | 0.71 (0.70, 0.72)    |

eTable 7: Sensitivity analysis where septic shock is defined as suspected infection + pSOFA  $\geq 2$  + vasoactive medication, removing the requirement for lactate testing. P value was calculated after comparing to septic shock with the lactate requirement (see Table 4).

| Variable                         | Septic Shock<br>(pSOFA $\geq 2$ + vasoactive<br>+lactate>2.0 mg/dL)<br>(n=374) | Septic Shock<br>(pSOFA $\geq 2$ + vasoactive only)<br>(n=523) | p-value            |
|----------------------------------|--------------------------------------------------------------------------------|---------------------------------------------------------------|--------------------|
| Age (median years, IQR)          | 8.8 (3.9 13.9)                                                                 | 9.6 (3.8 14.9)                                                | 0.308 <sup>2</sup> |
| Female (n, %)                    | 167 (44.7)                                                                     | 264 (50.5)                                                    | 0.150 <sup>1</sup> |
| Complex Chronic Condition (n, %) | 265 (72.8)                                                                     | 374 (72.1)                                                    | 0.809 <sup>1</sup> |
| Mechanical ventilation (n, %)    | 143 (38.2)                                                                     | 156 (29.8)                                                    | 0.008 <sup>1</sup> |
| <b>Outcomes</b>                  |                                                                                |                                                               |                    |
| In-hospital death (n, %)         | 30 (8.0)                                                                       | 42 (8.0)                                                      | 0.996 <sup>1</sup> |
| Hospital LOS (median hours, IQR) | 167.6 (93.1 291.0)                                                             | 136.1 (76.7 251.3)                                            | 0.005 <sup>2</sup> |
|                                  |                                                                                |                                                               |                    |

<sup>1</sup> Chi-squared. <sup>2</sup> Kruskal-Wallis test.

eTable 8: Distribution of CCC in study population. Visits may have more than one CCC

| CCC Categories Table   |                        |                     |               |              |                 |
|------------------------|------------------------|---------------------|---------------|--------------|-----------------|
| CCC Description        | No Suspected Infection | Suspected Infection | Sepsis        | Septic Shock | Total           |
| Cardiovascular Disease | 14481 (8.74%)          | 5603 (8.21%)        | 2816 (12.07%) | 53 (20.00%)  | 22953 (8.91%)   |
| Congenital/genetic     | 12937 (7.81%)          | 4907 (7.19%)        | 1853 (7.94%)  | 21 (7.92%)   | 19718 (7.66%)   |
| Gastrointestinal       | 34473 (20.80%)         | 16977 (24.88%)      | 7144 (30.61%) | 98 (36.98%)  | 58692 (22.79%)  |
| Immuno-Hematological   | 5956 (3.59%)           | 3074 (4.51%)        | 739 (3.17%)   | 14 (5.28%)   | 9783 (3.80%)    |
| Malignancy             | 1183 (0.71%)           | 1080 (1.58%)        | 675 (2.89%)   | 11 (4.15%)   | 2949 (1.14%)    |
| Metabolic              | 11716 (7.07%)          | 2733 (4.01%)        | 1617 (6.93%)  | 36 (13.58%)  | 16102 (6.25%)   |
| Neonatal               | 4715 (2.84%)           | 2272 (3.33%)        | 1379 (5.91%)  | 13 (4.91%)   | 8379 (3.25%)    |
| Neuromuscular          | 25328 (15.28%)         | 9082 (13.31%)       | 3511 (15.04%) | 68 (25.66%)  | 37989 (14.75%)  |
| Renal                  | 3489 (2.11%)           | 3801 (5.57%)        | 1590 (6.81%)  | 18 (6.79%)   | 8898 (3.45%)    |
| Respiratory            | 3643 (2.20%)           | 4810 (7.05%)        | 2510 (10.75%) | 28 (10.57%)  | 10991 (4.27%)   |
| Tech. Dependency       | 45689 (27.57%)         | 21414 (31.39%)      | 8221 (35.22%) | 104 (39.25%) | 75428 (29.28%)  |
| Transplant             | 1835 (1.11%)           | 1901 (2.79%)        | 880 (3.77%)   | 12 (4.53%)   | 4628 (1.80%)    |
| Other CCC              | 66705 (40.25%)         | 30476 (44.67%)      | 8860 (37.96%) | 71 (26.79%)  | 106112 (41.20%) |
| Total                  | 165744                 | 68228               | 23339         | 265          | 257576          |

eTable 9: a. Timing of death in suspected infection cohort, b. test characteristics of pSOFA  $\geq 2$  as predictor of in-hospital mortality among patients with suspected infection

a.

| <b>Timing of death</b> | <b>N(%)</b> |
|------------------------|-------------|
| Total deaths (post ED) | 561 (ref)   |
| Within 48h             | 136 (24.2)  |
| Within 72h             | 186 (33.2)  |
| Within 96h             | 214 (38.1)  |
| Within 1 week          | 286 (51.0)  |

b.

| <b>Test Characteristic</b> | <b>All Deaths % (95% CI)</b> | <b>Deaths by 48h % (95% CI)</b> | <b>Deaths by 1 week</b> |
|----------------------------|------------------------------|---------------------------------|-------------------------|
| Sensitivity                | 0.71 (0.67, 0.75)            | 0.76 (0.68, 0.82)               | 0.75 (0.70, 0.80)       |
| Specificity                | 0.93 (0.93, 0.93)            | 0.93 (0.93, 0.93)               | 0.93 (0.93, 0.93)       |
| Positive Predictive Value  | 0.009 (0.008, 0.010)         | 0.002 (0.002, 0.003)            | 0.005 (0.004, 0.006)    |
| Negative Predictive Value  | 1.0 (1.0, 1.0)               | 1.000 (1.000, 1.000))           | 1.000 (1.000, 1.000)    |
| Positive Likelihood Ratio  | 10.63 (10.05, 11.21)         | 11.26 (10.170, 12.335)          | 11.20 (10.434, 11.957)  |
| Negative Likelihood Ratio  | 0.31 (0.27, 0.35)            | 0.260 (0.183, 0.350)            | 0.266 (0.212, 0.320)    |
| Area Under ROC Curve       | 0.822 (0.803, 0.841)         | 0.845 (0.809, 0.881)            | 0.842 (0.817, 0.867)    |
