# Supplementary material
Source: PubMed Central journal article supplement (PMC9112137)
Supplement: jamapediatr-e221301-s002.pdf [file jamapediatr-e221301-s002.pdf]

\*First name, last name, and suffix (if applicable) are required and will appear in PubMed.

| <b>*Group Name(s): Pediatric Emergency Care Applied Research Network (PECARN) PED Screen and PECARN Registry Study Groups</b> |                   |                              |                  |                                                   |                                          |                                                         |                                                                                            |
|-------------------------------------------------------------------------------------------------------------------------------|-------------------|------------------------------|------------------|---------------------------------------------------|------------------------------------------|---------------------------------------------------------|--------------------------------------------------------------------------------------------|
| <b>*First Name and Middle Initial(s)</b>                                                                                      | <b>*Last Name</b> | <b>*Suffix (eg, Jr, III)</b> | Academic Degrees | Institution                                       | Location (city, state/province, country) | Role or Contribution, eg, chair, principal investigator | Group (if more than 1 Group listed in the byline) and/or Subgroup (eg, Steering Committee) |
| Joseph                                                                                                                        | Zorc              |                              | MD               | Children's Hospital of Philadelphia               | Philadelphia, PA                         | Site PI                                                 | PECARN Registry Study Group                                                                |
| David                                                                                                                         | Brousseau         |                              | MD               | Children's Hospital of Wisconsin                  | Milwaukee, WI                            | Site PI                                                 | PECARN Registry Study Group                                                                |
| Lynn                                                                                                                          | Babcock           |                              | MD               | Cincinnati Children's Hospital and Medical Center | Cincinnati, OH                           | Site PI                                                 | PECARN Registry Study Group                                                                |
| Rachel                                                                                                                        | Stanley           |                              | MD               | Nationwide Children's Hospital                    | Columbus, OH                             | Site PI                                                 | PECARN Registry Study Group                                                                |
| Cara                                                                                                                          | Elsholz           |                              |                  | University of Utah                                | Salt Lake City, UT                       | Data Coordinating Center Project Manager                | PECARN Registry Study Group, PECARN PED Screen Study Group                                 |
| Brent                                                                                                                         | Hulsey            |                              |                  | University of Utah                                | Salt Lake City, UT                       | Data Coordinating Center Project Manager                | PECARN Registry Study Group, PECARN PED Screen Study Group                                 |
